# Supplementary material for: Interference in transcription of overexpressed genes by promoter-proximal downstream sequences
Source: PubMed Central journal article supplement (PMC4971500; doi:10.1038/srep30735), 2016-08-03
Supplement: srep30735-s1.pdf [file srep30735-s1.pdf]

# SUPPLEMENTARY MATERIAL

## Interference in transcription of overexpressed genes by promoter-proximal downstream sequences

*Turchinovich A\*<sup>1,2</sup>, Surowy HM<sup>1,2</sup>, Tonevitsky A<sup>3</sup> and Burwinkel B<sup>1,2</sup>*

*\* corresponding author*

Email: [a.turchinovich@dkfz.de](mailto:a.turchinovich@dkfz.de)

Tel: +49 6221 421461

Fax: +49 6221 421464

1 - Molecular Epidemiology C080, German Cancer Research Center, Im Neuenheimer Feld 581, Heidelberg, Germany

2 - Molecular Biology of Breast Cancer, Department of Gynecology and Obstetrics, Im Neuenheimer Feld 440, Heidelberg, Germany

3 - Hertsen Federal Medical Research Centre of the Ministry of Health of the Russian Federation, Moscow, Russia

A

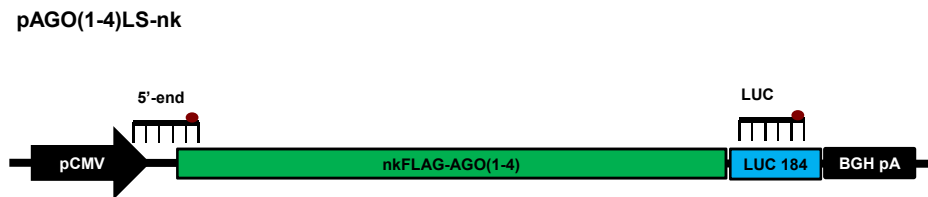

B

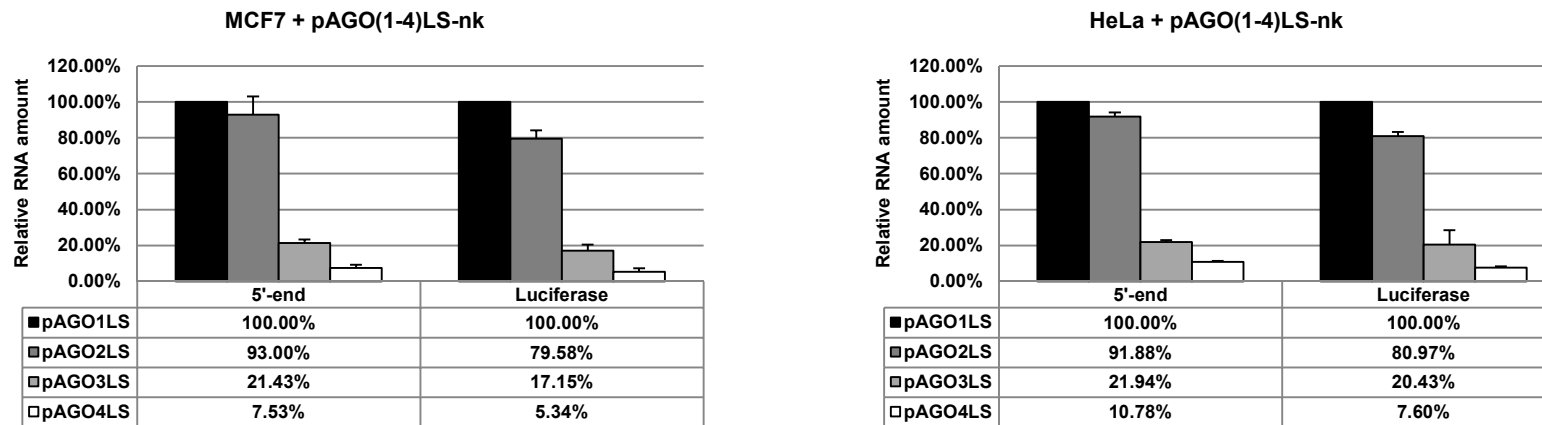

**Supplementary Material 1. A.** Structure of pAGO1LS-nk, pAGO2LS-nk, pAGO3LS-nk and pAGO4LS-nk plasmids encoding protein-null FLAG-AGO proteins, and the location of qPCR TaqMan Assays. **B.** TaqMan qPCR analysis of recombinant mRNAs generated from pAGO(1-4)LS-nk plasmids in MCF7 and HeLa cells 24 h after transfection. Data is presented as mRNA levels relative to pAGO1LS-nk and normalized on the NeoR mRNA levels for each construct. Each bar represents mean+S.D of three independent transfections.

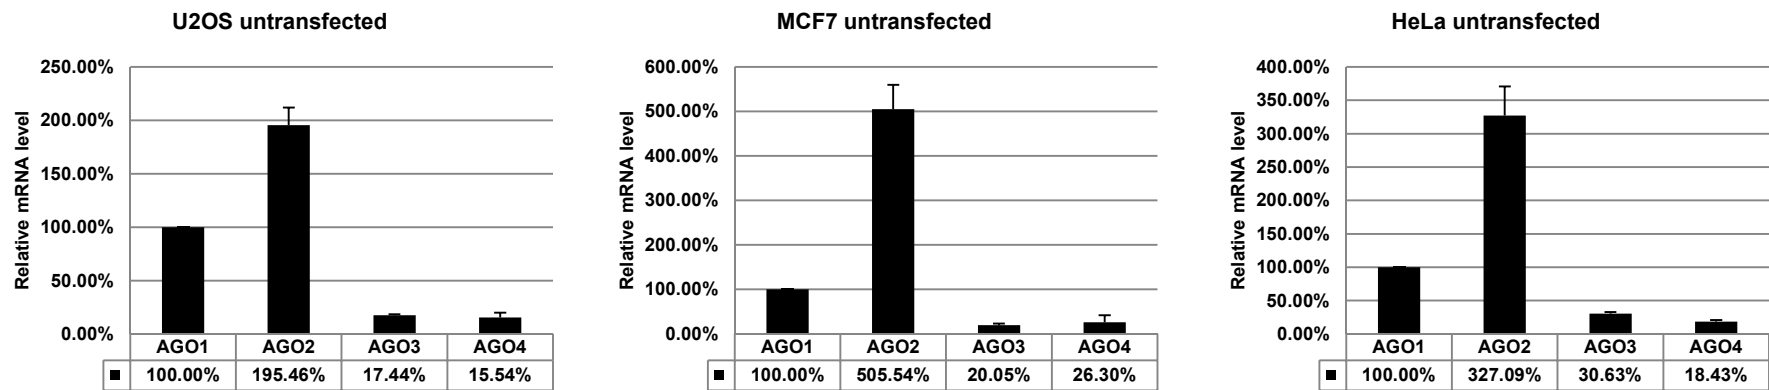

**Supplementary Material 2.** Relative expression of four human AGO1, AGO2, AGO3 and AGO4 mRNAs in U2OS, MCF7 and HeLa cell lines measured by AGO-specific TaqMan qPCR Assays (Applied Biosystems: Hs01084653\_m1 for AGO1, Hs00293044\_m1 for AGO2, Hs00227461\_m1 for AGO3 and Hs01059731\_m1 for AGO4). qPCR efficiencies of all TaqMan assays was considered to be equal 2. Data is presented as a fold change compared to AGO1 mRNA, each bar represents mean+S.D of three independent RNA isolations

A

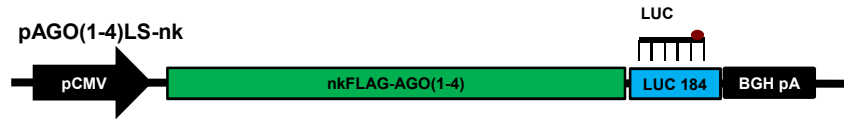

B

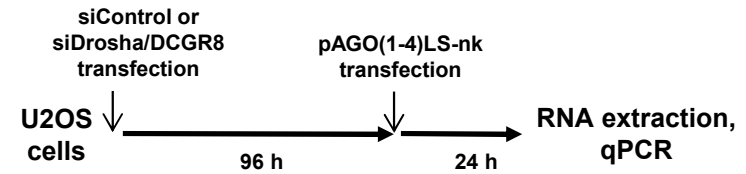

C

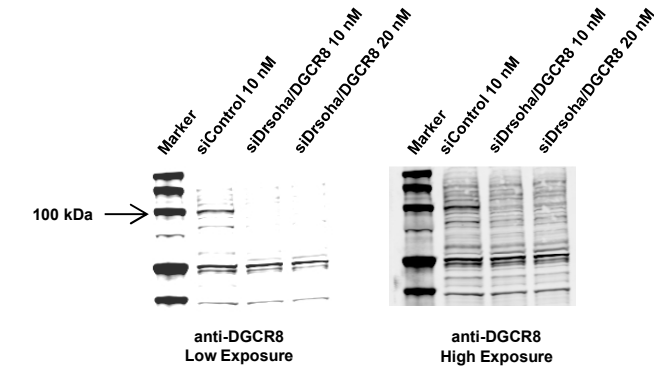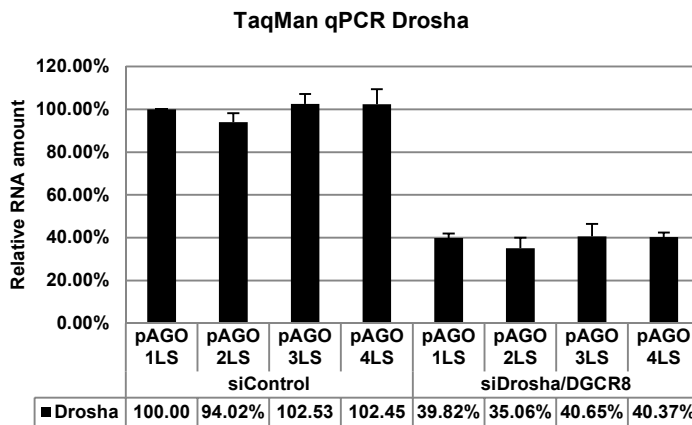

D

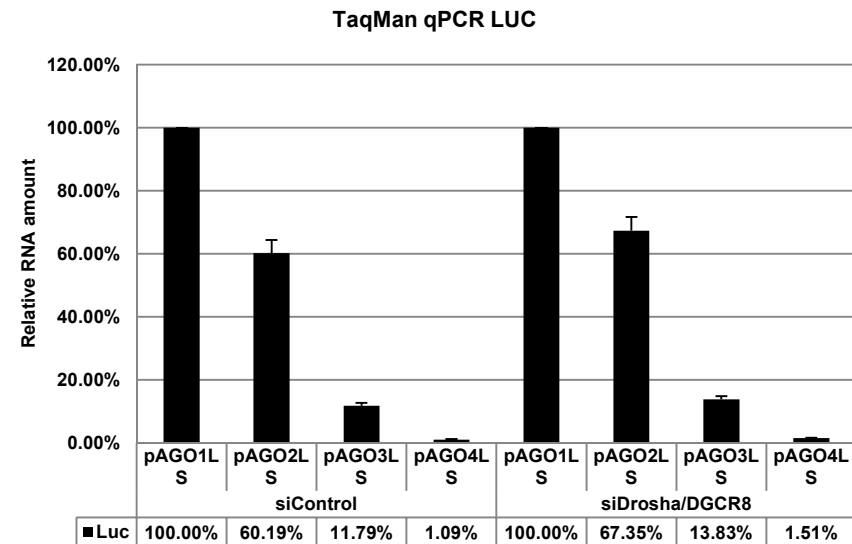

**Supplementary Material 3. A.** Structure of pAGO1LS-nk, pAGO2LS-nk, pAGO3LS-nk and pAGO4LS-nk plasmids encoding protein-null FLAG-AGO proteins, and the location of qPCR TaqMan Assays. **B.** Schematic representation of experimental workflow. U2OS cells were transfected with either siControl or equimolar mixture of siDrosha and siDGCR8 siRNA smart pools (Dharmacon) at final concentrations of 10 nM (replicate 1) or 20 nM (replicate 2) using siLentFect Lipid Reagent (Bio-Rad) 96h before transfection with pAGO1LS-nk, pAGO2LS-nk, pAGO3LS-nk and pAGO4LS-nk plasmids. The adherent cells were trypsinated 72h after transfection with siRNA, seeded on 24-well plates and let to recover for 24h before transfecting with plasmid DNAs. Finally, 24 h after transfection with plasmids, the total RNA and protein were collected. The relative expression of ectopic AGO(1-4) transcripts and endogenous Drosha mRNA were analyzed with corresponding TaqMan qPCR Assays. The knockdown of DGCR8 protein was analyzed only on western immunoblotting. **C. Upper part:** Western immunoblot performed on U2OS cells 96h after transfection with siControl (10 nM) or siDrosha/DGCR8 (10 nM or 20 nM) using an equimolar mixture of C-terminus and N-terminus specific anti-DGCR8 antibody (Sigma, cat. SAB4200088 and cat. SAB4200089). **Lower part:** TaqMan qPCR analysis of relative expression of Drosha mRNA after transfection of U2OS cells with pAGO(1-4)LS-nk and siDrosha/DGCR8. Data is presented as mRNA levels relative to Drosha mRNA amount in pAGO1LS+siControl transfected cells (taken as 100%) and normalized on Actin mRNA levels for each samples. Each bar represents mean+S.D of two replicates (10 nM or 20 nM siDrosha/DGCR8). **D.** TaqMan qPCR analysis of relative overexpression of recombinant Argonaute transcripts 24 h after transfection of U2OS cells with pAGO(1-4)LS-nk and either siControl or siDrosha/DGCR8. Each bar represents mean+S.D of two replicates. Note, simultaneous silencing of microprocessor components Drosha and DGCR8 did not affect the pattern of Argonautes overexpression in U2OS cells.

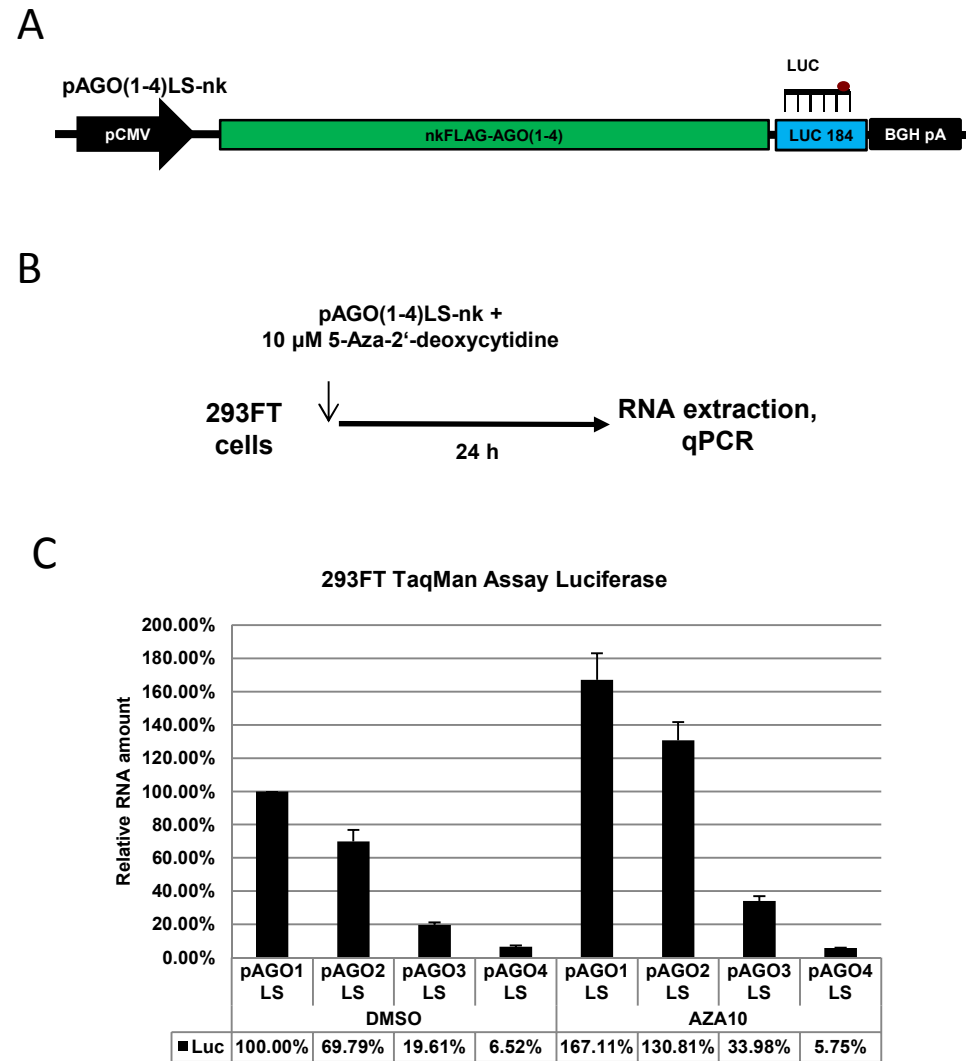

**Supplementary Material 4. A.** Structure of pAGO1LS-nk, pAGO2LS-nk, pAGO3LS-nk and pAGO4LS-nk plasmids encoding protein-null FLAG-AGO proteins, and the location of qPCR TaqMan Assays. **B.** Schematic representation of experimental workflow. 293FT cells were treated with transfection mix containing one of the pAGO(1-4)LS-nk plasmids and 10  $\mu$ M 5-aza-2'-deoxycytidine for 24 h before RNA isolation and subsequent qRT-PCR analysis. **C.** TaqMan qPCR analysis of relative overexpression of exogenous AGO cDNAs 24 h after transfection of cells with pAGO(1-4)LS and either DMSO or 10  $\mu$ M 5-aza-2'-deoxycytidine. Data is presented as mRNA levels relative to transcripts in pAGO1LS-nk+DMSO transfected cells (taken as 100%) and normalized on NeoR mRNA levels. Each bar represents mean+S.D of three independent transfections/treatments. Note, treatment with the demethylating agent 5-aza-2'-deoxycytidine (which supposed to block possible methylation of CMV promoter) did not significantly affect patterns of Argonautes overexpression in 293FT cells. Higher expression of AGO1, AGO2 and AGO3 transcripts in 10  $\mu$ M 5-aza-2'-deoxycytidine treated 293FT cells compared to DMSO indicate that methylation of ectopic CMV promoter may prevent overexpression from this promoter to a minor extent in this cells.

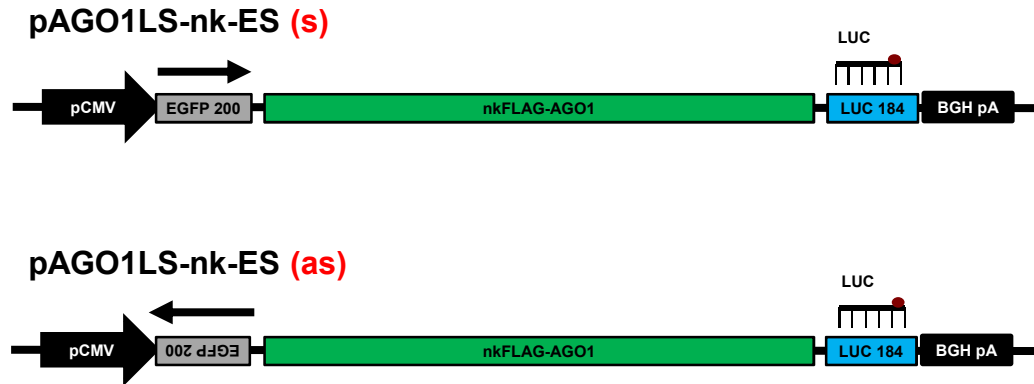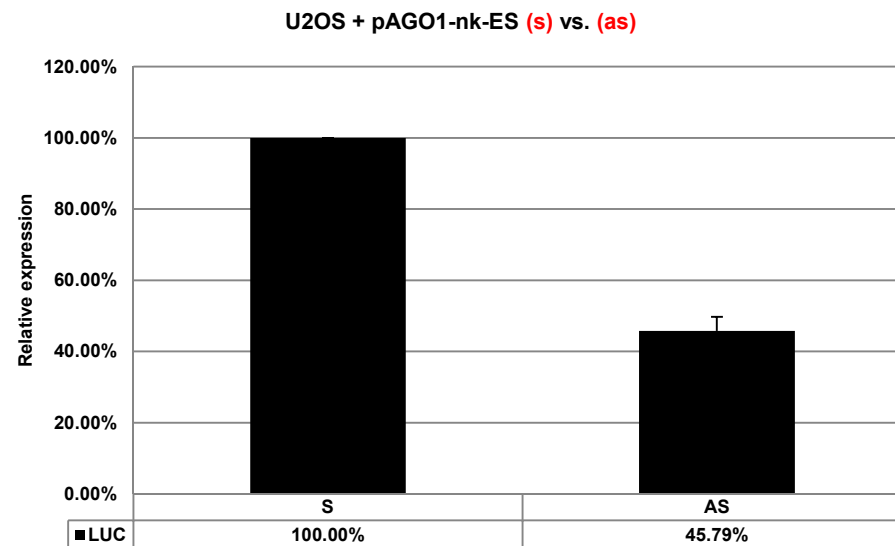

**Supplementary Material 5.** Structure of pAGO1LS-nk-ES containing short 200 bp fragment of EGFP gene right upstream the protein-null FLAG-AGO1 sequences either in sense (s) or antisense (as) orientation; and TaqMan qPCR analysis of recombinant mRNAs generated from those plasmids in U2OS cells 24 h after transfection. The location of the 3'-end (luciferase) TaqMan qPCR assays is indicated on the plasmid map. Data is presented as a graph combining relative overexpression efficacy of transcripts from plasmids with sense EGFP orientation (taken as 100%) vs. transcripts containing EGFP in antisense orientation. Each bar represents mean+S.D of three independent transfections. Note, significant dependence of transcription depending on the orientation of short 200 bp EGFP fragment directly downstream the promoter.

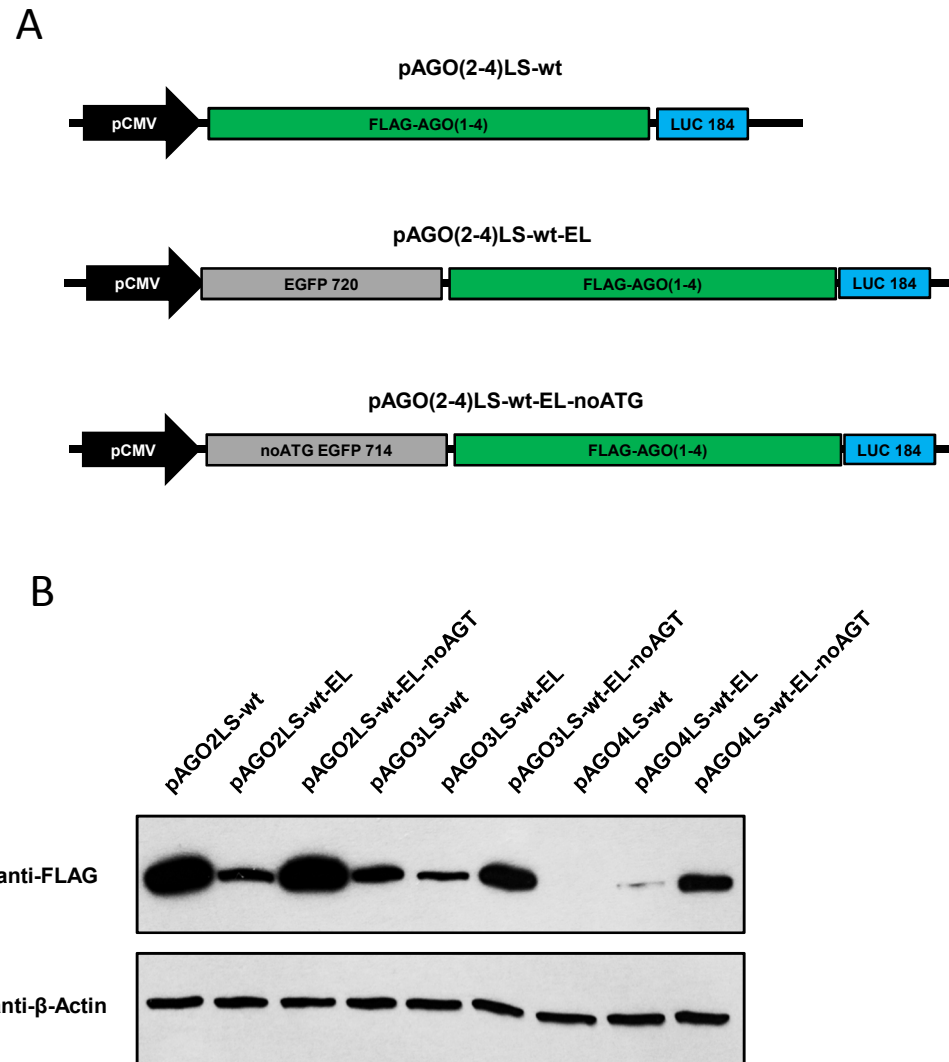

**Supplementary Material 6. A.** Structure of parental pAGO(2-4)LS-wt and their derivatives: pAGO(2-4)LS-wt-EL - carrying 720 bp protein-null EGFP coding sequence (w/o the first ATG codon and the middle ORF ATG codon) upstream the FLAG-AGOs coding sequences and pAGO(2-4)LS-wt-EL-noATG - carrying 714 bp EGFP coding sequence (w/o all ATG codons). **B.** Western immunoblot performed with anti-FLAG antibody showing relative FLAG-AGO2, FLAG-AGO3 and FLAG-AGO4 proteins expression in U2OS cells 24 h after transfection with pAGO(2-4)LS-wt, pAGO(2-4)LS-wt-EL and pAGO(2-4)LS-wt-ELnoATG constructs. Note, recombinant proteins production is significantly impaired when upstream EGFP fragments contained ATG codons.

A

|                      |                        |                                 |                            |
|----------------------|------------------------|---------------------------------|----------------------------|
| AGO1 vs AGO2 = 75.5% | AGO1i vs AGO2i = 72.3% | AGO1ii vs AGO2ii = 75.8%        | AGO1iii vs AGO2iii = 80.3% |
| AGO1 vs AGO3 = 73.0% | AGO1i vs AGO3i = 68.4% | AGO1ii vs AGO3ii = 76.4%        | AGO1iii vs AGO3iii = 74.7% |
| AGO1 vs AGO4 = 73.5% | AGO1i vs AGO4i = 72.7% | AGO1ii vs AGO4ii = 75.3%        | AGO1iii vs AGO4iii = 74.4% |
| AGO2 vs AGO3 = 70.7% | AGO2i vs AGO3i = 67.3% | AGO2ii vs AGO3ii = 72.9%        | AGO2iii vs AGO3iii = 72.5% |
| AGO2 vs AGO4 = 70.2% | AGO2i vs AGO4i = 68.6% | AGO2ii vs AGO4ii = 72.3%        | AGO2iii vs AGO4iii = 73.0% |
| AGO3 vs AGO4 = 73.8% | AGO3i vs AGO4i = 70.7% | <b>AGO3ii vs AGO4ii = 77.1%</b> | AGO3iii vs AGO4iii = 77.6% |

B

|         |                                                                |     |     |     |     |     |                                                              |     |     |     |     |     |  |
|---------|----------------------------------------------------------------|-----|-----|-----|-----|-----|--------------------------------------------------------------|-----|-----|-----|-----|-----|--|
|         | 40                                                             | 50  | 60  | 70  | 80  | 90  | 510                                                          | 520 | 530 | 540 | 550 | 560 |  |
| AGO3 ii | GCCACTAGAAGTCTGTAATATTGGCAGGGCAACGATGTATCAAGAAGCTAACAGACAA     |     |     |     |     |     | GGGGCAGACAGCGTAGAGCCCATGTTCCGGCATCTCAAGAACACATATTCTGGCCTACAG |     |     |     |     |     |  |
| AGO4 ii | GCCACTCGAGGCTCTGTAATATAGTGGCAGGACAGCGATGTATCAAGAAGCTCACAGACAA  |     |     |     |     |     | GGTGCAGACAGTGTGGAGCCTATGTTTAAACATCTGAAAATGACTTATGTGGGCTACAG  |     |     |     |     |     |  |
|         | 10                                                             | 20  | 30  | 40  | 50  | 60  | 480                                                          | 490 | 500 | 510 | 520 | 530 |  |
| AGO3 ii | 100                                                            | 110 | 120 | 130 | 140 | 150 | 570                                                          | 580 | 590 | 600 | 610 | 620 |  |
| AGO4 ii | TCAGACTCCACTATGATCAAGGCAACAGCAAGATCTGCACCAGATAGACAAGAGGAAAT    |     |     |     |     |     | CTTATTATCGTCATCCTGCCGGGGAAGACACCAGTGTATGCGGAAGTGAACGTGTAGGA  |     |     |     |     |     |  |
|         | 70                                                             | 80  | 90  | 100 | 110 | 120 | 540                                                          | 550 | 560 | 570 | 580 | 590 |  |
| AGO3 ii | 160                                                            | 170 | 180 | 190 | 200 | 630 | 640                                                          | 650 | 660 | 670 | 680 |     |  |
| AGO4 ii | TAGCAGATTGGTAAGAAGTGCAA-ATTATGA-----AACAGATCCATTTGTTCAAGGAG    |     |     |     |     |     | GACACACTTTTGGGTATGGCTACACAATGTGTTCAAGTCAAGAATGTAATAAAAACATCT |     |     |     |     |     |  |
|         | 130                                                            | 140 | 150 | 160 | 170 | 600 | 610                                                          | 620 | 630 | 640 | 650 |     |  |
| AGO3 ii | 210                                                            | 220 | 230 | 240 | 250 | 260 | 690                                                          | 700 | 710 | 720 | 730 | 740 |  |
| AGO4 ii | TTTCAATTTAAAGTTCGGGATGAAATGGCTCATGTAAGTGGACGCTACTCCAGCACCT     |     |     |     |     |     | CCTCAAACCTTGTCAAACCTGTGCCTAAAGATAAATGTTAAACTCGGAGGGATCAATAAT |     |     |     |     |     |  |
|         | 180                                                            | 190 | 200 | 210 | 220 | 230 | 660                                                          | 670 | 680 | 690 | 700 | 710 |  |
| AGO3 ii | 270                                                            | 280 | 290 | 300 | 310 | 320 | 750                                                          | 760 | 770 | 780 | 790 | 800 |  |
| AGO4 ii | ATGCTCCAGTATGGGGGACGGAAATCGGACAGTAGCAACACCCGAGCCATGGAGTATGGGAC |     |     |     |     |     | ATTCTTGACCTCATCAAAGACCTTCTGTGTTCCAGCAACCAGTGTATCTTTTGGGAGCC  |     |     |     |     |     |  |
|         | 240                                                            | 250 | 260 | 270 | 280 | 290 | 720                                                          | 730 | 740 | 750 | 760 | 770 |  |
| AGO3 ii | 330                                                            | 340 | 350 | 360 | 370 | 380 | 810                                                          | 820 | 830 | 840 | 850 | 860 |  |
| AGO4 ii | ATGCGAGGAAACAATTCCACACAGGAGTTGAAATCAAATGTGGGCTATCGCTTGTTTT     |     |     |     |     |     | GATGTCACTCATCCACCTGCTGGTGATGGAAAGAAGCCTTCTATTGCTGCTGTTGTAGGT |     |     |     |     |     |  |
|         | 300                                                            | 310 | 320 | 330 | 340 | 350 | 780                                                          | 790 | 800 | 810 | 820 | 830 |  |
| AGO3 ii | 390                                                            | 400 | 410 | 420 | 430 | 440 | 870                                                          | 880 | 890 | 900 | 910 | 920 |  |
| AGO4 ii | GCCACACAGAGGACAGTGCAGAGAAGAAATATTGAAGGGTTTCCAGACACAGCTGCGTAAG  |     |     |     |     |     | AGTATGGATGCACACCCAAGCAGACTGTGCCACAGTAAAGTTCAGAGACCCCGACAG    |     |     |     |     |     |  |
|         | 360                                                            | 370 | 380 | 390 | 400 | 410 | 840                                                          | 850 | 860 | 870 | 880 | 890 |  |
| AGO3 ii | 450                                                            | 460 | 470 | 480 | 490 | 500 | 930                                                          | 940 | 950 |     |     |     |  |
| AGO4 ii | ATTTCTAAGGATGCAGGGATGCCATCCAGGGCCAGCCATGCTTCTGCAAAATATGCACAG   |     |     |     |     |     | GAGATCATCCAGGACTTGGCCTCCATGGTC                               |     |     |     |     |     |  |
|         | 420                                                            | 430 | 440 | 450 | 460 | 470 | 900                                                          | 910 | 920 |     |     |     |  |

Supplementary Material 7. A. Percentage of sequence identity calculated after alignment of corresponding Argonaute sequences. B. Alignment of AGO3ii and AGO4ii regions.



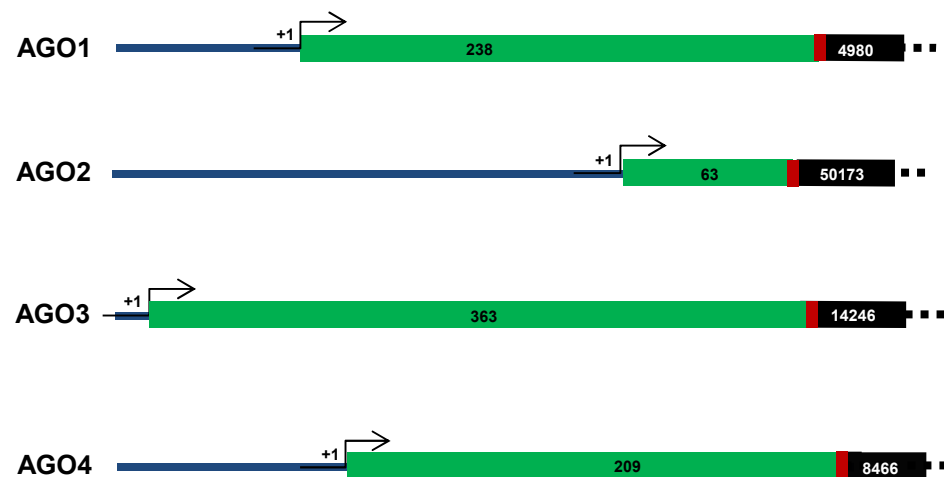

**Supplementary Material 8.** The location and the length of first exons (green boxes) and the first introns (black boxes) of human AGO1, AGO2, AGO3 and AGO4 genes relative to their TSSs. The length is indicates in base pairs within each box. The location of the 19 bp part of Argonautes coding sequences are indicated in red box. Endogenous human AGO sequences are located in 19 separate exons; and only 19 nucleotides of their coding sequences are located in the first exon in a relatively close proximity from the transcription start site (TSS) (344 bp for AGO3 and 190 bp for AGO4). Second exons, carrying another 182 bp (for AGO3) and 173 nt (for AGO4) of the coding sequences are located 14246 nt and 8466 nt downstream.

# Supplementary Material P1

## FLAG-AGO cloning (XbaI/EcoRI)

### pAGO(1-4)LS-wt

AGO forward xbaI

AGO reverse

## No Kozak FLAG-AGO cloning (XbaI/EcoRI)

### pAGO(1-4)LS-nk

AGO NK forward xbaI

AGO reverse

## Luciferase Fragments cloning (EcoRI/BamHI)

### pAGO(1-4)LS

Lucs Forward EcoRI

Lucs Reverse BamHI

### pAGO(1-4)LL

Lucl Forward EcoRI

Lucl Reverse BamHI

## Luciferase Fragments cloning (XbaI)

### pAGO(1-4)LUL

Luc Forward XbaI

Luc Reverse XbaI

## Deletion mutagenesis primers

### pdelAGO1(i-iii)

Ago1for1

Ago1rev1

Ago1for2

Ago1rev2

Ago1for3

Ago1rev3

### pdelAGO2(i-iii)

Ago2for1

Ago2rev1

Ago2for2

Ago2rev2

Ago2for3

Ago2rev3

### pdelAGO3(i-iii)

Ago3for1

Ago3rev1

Ago3for2

Ago3rev2

Ago3for3

Ago3rev3

### pdelAGO4(i-iii)

Ago4for1

Ago4rev1

Ago4for2

Ago4rev2

Ago4for3

Ago4rev3

## AGO Fragments cloning (XbaI/EcoRI)

### pAGO1i, pAGO1ii, pAGO1iii

## Primers and Probes

gatatctaga cgatatcgccgcccatg  
ctggcggcgttactagtggatccactgaattc

gata tctaga ggactacaaggacgacgatg  
ctggcggcgttactagtggatccactgaattc

ggcc gaa ttc tga acg tgc aaa  
gaga gga tcc gga gtt cat gat

ggcc gaa ttc atg gaa gac gcc aaa aac  
gaga gga tcc tta cac ggc gat ctt tcc

gata tctaga gaa gac gcc aaa aac ata  
gata tctaga tta cac ggc gat ctt tcc

phos-cag gaa caa aag cat acc tac  
phos-cat gcg gcc gct agc gta atc  
phos-tac aag tcc acc cgt ttc aag  
phos-gcc aac ttg tag gca ggg cag  
phos-gcc gtg cag gtt cac cag gat  
phos-gaa ttg gat gag gag ctc acg

phos-agg cac aag ttg gtt ctg cgc  
phos-cat gcg gcc gct agc gta atc  
phos-gtg cag cag cac cgg cag gag  
phos-gtc ctt gaa ata ctg ggc cac  
phos-gcc aag gcg gtc cag gtt cac  
phos-gcg cac ggt ggc gca gta cgc

phos-caa gtc ggg cag gaa cag aaa cac  
phos-cat gcg gcc gct agc gta atc  
phos-att caa ttt tat aag tca act cgg  
phos-cag aca ggg aag gtg cgg gta ctt  
phos-ctt gcc aag gct gta cag att cac  
phos-aag aag ttc ccg gac cat gga ggc

phos-cca ctc gag gtc tgt aat ata gtg  
phos-cat gcg gcc gct agc gta atc  
phos-ctg att cag ttc tac aaa tcc aca  
phos-caa gta tgt atg ctt ttg ttc ttg  
phos-gcc ttg gct aag gct gtg caa atc  
phos-cag ctc tcg aac cat gtt agt cag

AGO NK forward xbal  
AGO1iR  
AGO1iiF  
AGO1iIR  
AGO1iiiF  
AGO reverse

**pAGO2i, pAGO2ii, pAGO2iii**

AGO NK forward xbal  
AGO2iR  
AGO2iiF  
AGO2iIR  
AGO2iiiF  
AGO reverse

**pAGO3i, pAGO3ii, pAGO3iii**

AGO NK forward xbal  
AGO3iR  
AGO3iiF  
AGO3iIR  
AGO3iiiF  
AGO reverse

**pAGO4i, pAGO4ii, pAGO4iii**

AGO NK forward xbal  
AGO4iR  
AGO4iiF  
AGO4iIR  
AGO4iiiF  
AGO reverse

gata tctaga ggactacaaggacgacgatg  
ggcc gaattc gccaactgttaggcagggcag  
gata tctaga cag gaa caa aag cat acc tac  
ggcc gaattc gaa ttg gat gag gag ctc acg  
gata tctaga tacaagtccaccctttcaag  
ctggcggccgttactagtggatccactgaattc

gata tctaga ggactacaaggacgacgatg  
ggcc gaattc gtc ctt gaa ata ctg ggc cac  
gata tctaga agg cac aag ttg gtt ctg cgc tac  
ggcc gaattc gcg cac ggt ggc gca gta gcg  
gata tctaga gtg cag cag cac cgg cag gag  
ctggcggccgttactagtggatccactgaattc

gata tctaga ggactacaaggacgacgatg  
ggcc gaattc cagacaggggaaggtgcgggt  
gata tctaga caagtcgggcaggaacagaaac  
ggcc gaattc aagaagttcccggaccatggag  
gata tctaga ttcaattttataagtcaactc  
ctggcggccgttactagtggatccactgaattc

gata tctaga ggactacaaggacgacgatg  
ggcc gaattc caagtatgtatgctttgttc  
gata tctaga ccaactcgaggtctgtaatatag  
ggcc gaattc cagctctcgaaccatgttagtc  
gata tctaga ctgattcagttctacaaatcc  
ctggcggccgttactagtggatccactgaattc

**EFGP Fragments cloning (Xbal)**

**pAGO(1-4)LS-nk-ES**

EGFPs Forward Xbal  
EGFPs Reverse Xbal

**pAGO(1-4)LS-nk-EL**

EGFPL Forward Xbal  
EGFPL Reverse Xbal

gata tctaga atg ccc gaa ggc tac gtc  
gata tctaga gcc atg ata tag acg ttg

gata tctaga gtg agc aag ggc gag gag  
gata tctaga tta ctt gta cag ctc gtc

**EFGP mutagenesis primers**

KiiIORFf:  
KiiIORFr:

phos-tgc ccg aag gct acg tcc agg  
phos-ggc gga ctt gaa gaa gtc gtc

**UBC promoter cloning**

UBCmluF:  
UBCxbaRS:  
UBCxbaRL:

gaga acgcgt gtg tcg gct cca gat ctg  
ggcc tctaga gtg acg atc aca gcg atc  
ggcc tctaga gtc taa caa aaa agc caa aaa cg

**E1 $\alpha$  promoter cloning**

EPmluF:  
EPxbaRS:  
EPxbaRLc:

gaga acgcgt cgt gag gct ccg gtg ccc gt  
ggcc tctaga tgt gtt ctg gcg gca aac ccg  
ggcc tctaga ctc acg aca cct gaa atg gaa

**mPGK promoter cloning**

PGKmluF:  
PGKxbaRL:

gaga acgcgt atg gtc gag tac cgg gta g  
ggcc tctaga ccg cta gag gtc gaa agg

**TK promoter cloning**

TKfmlu:  
TKrxba:

gaga acgcgt aaa tga gtc ttc gga cct  
ggcc tctaga ccc agt gcc tca cga cca

## CMV enhancer mutagenesis primers

KillCMVeF:

phos-gtg atg cgg ttt tgg cag tac

KillCMVeR:

phos-cgg aac tcc ata tat ggg cta

## 5'-end TaqMan Assay

5'-end forward

CCAAGCTGGCTAGCGTTTA

5'-end reverse

TAATCGGGCACGTCATAAGG

5'-end probe

FAM-CGGGCCCTCTAGAGGACTACAAGGA-TAMRA

## EGFP TaqMan Assay

EGFP forward

ACGACGGCAACTACAAGACC

EGFP reverse

GTCCTCCTTGAAGTCGATGC

EGFP probe

FAM-CGACACCCTGGTGAACCGCA-TAMRA

## Luciferase TaqMan Assay

Luciferase forward

CCAGGGATTTTCAGTCGATGT

Luciferase reverse

GGACTCTGGCACAAAATCGT

Luciferase probe

FAM-TCGTACATCTCATCTACCTCCCGG-TAMRA

## NeoR TaqMan Assay

NeoR forward

CTCCTGCCGAGAAAGTATCCA

NeoR reverse

GCCGGATCAAGCGTATGC

NeoR probe

FAM-CGCCGCATTGCATCAGCCAT-TAMRA
